# Supplementary material for: Heterogeneous metal alloy engineering: embryonic growth of M13icosahedra in Ag-based alloy superatomic nanoclusters
Source: Royal Society of Chemistry journal article supplement (doi:10.1039/d0cc05575a), 2020-01-01
Supplement: d0cc05575a1.pdf [file d0cc05575a1.pdf]

Supporting Information

## Heterogeneous Metal Alloy Engineering: Embryonic Growth of $M_{13}$ icosahedron in Ag-based Alloy Superatomic Nanoclusters

*Ying Liu,<sup>a,b</sup> Shuxin Wang,<sup>c</sup> Xi Kang,<sup>a,b</sup> Bing Yin,<sup>a,b</sup> Shan Jin,<sup>a,b</sup> Shuang Chen,<sup>\*a,b</sup> and  
Manzhou Zhu<sup>\*a,b</sup>*

- a. Department of Chemistry and Centre for Atomic Engineering of Advanced Materials, Anhui Province Key Laboratory of Chemistry for Inorganic/Organic Hybrid Functionalized Materials, Anhui University, Hefei, Anhui, 230601, China.  
Emails: [chenshuang@ahu.edu.cn](mailto:chenshuang@ahu.edu.cn); [zmz@ahu.edu.cn](mailto:zmz@ahu.edu.cn);*
- b. Department Institutes of Physical Science and Information Technology, Key Laboratory of Structure and Functional Regulation of Hybrid Materials, Ministry of Education, Anhui University, Hefei, Anhui, 230601, China.*
- c. College of Materials Science and Engineering, Qingdao University of Science and Technology, Qingdao 266042, P. R. China.*

## Table of Contents

### Section 1. Experimental Procedures

Materials and Synthesis

Instrumentations

### Section 2. Supplementary Figures

Figure S1. ESI of Au<sub>3</sub>Ag<sub>48</sub>.

Figure S2. ESI of Pt<sub>2</sub>Ag<sub>51</sub>.

Figure S3. XPS of Au<sub>3</sub>Ag<sub>48</sub> and Pt<sub>2</sub>Ag<sub>51</sub>.

Figure S4. <sup>31</sup>P NMR spectrum of Pt<sub>2</sub>Ag<sub>51</sub>.

Figure S5. TGA of Au<sub>3</sub>Ag<sub>48</sub>.

Figure S6. TGA of Pt<sub>2</sub>Ag<sub>51</sub>.

Figure S7. Total structure of [Au<sub>3</sub>Ag<sub>48</sub>(S-Adm)<sub>28</sub>Cl<sub>7</sub>](SbF<sub>6</sub>)<sub>2</sub>.

Figure S8. Total structure of [Pt<sub>2</sub>Ag<sub>51</sub>(S-Adm)<sub>28</sub>(PPh<sub>3</sub>)<sub>2</sub>Cl<sub>7</sub>](SbF<sub>6</sub>)<sub>2</sub>.

Figure S9. UV-Vis spectra of Au<sub>3</sub>Ag<sub>48</sub> and Pt<sub>2</sub>Ag<sub>51</sub>.

Figure S10. The UV-vis absorption spectra variation of Au<sub>3</sub>Ag<sub>48</sub> and Pt<sub>2</sub>Ag<sub>51</sub> in ambient.

Figure S11. The UV-vis absorption spectra variation of Au<sub>3</sub>Ag<sub>48</sub> and Pt<sub>2</sub>Ag<sub>51</sub> at 50 °C.

Figure S12. The UV-vis absorption spectra variation of Au<sub>3</sub>Ag<sub>48</sub> and Au<sub>8</sub>Ag<sub>57</sub> at 50 °C.

Figure S13. Photoluminescence of Au<sub>3</sub>Ag<sub>48</sub> and Pt<sub>2</sub>Ag<sub>51</sub>.

### Section 3. Supplementary Tables

Table S1. Atom ratio of Au and Ag in Au<sub>3</sub>Ag<sub>48</sub>.

Table S2. Atom ratio of Pt and Ag in Pt<sub>2</sub>Ag<sub>51</sub>.

Table S3. Crystal data and structure refinement for Au<sub>3</sub>Ag<sub>48</sub>.

Table S4. Crystal data and structure refinement for Pt<sub>2</sub>Ag<sub>51</sub>.

## Section 1. Experimental Procedures

### Materials and Synthesis

#### Materials

Unless specified, all reagents were purchased from Sigma-Aldrich and used as received without further purification. Tetrachloroauric(III) acid ( $\text{HAuCl}_4 \cdot 3\text{H}_2\text{O}$ , >99.99% metals basis), Chloroplatinic acid ( $\text{H}_2\text{PtCl}_6 \cdot 6\text{H}_2\text{O}$ , >99.99% metals basis), silver nitrate ( $\text{AgNO}_3$ , >99%), 1-adamantanethiol (HS-Adm, >99%), Triphenylphosphine ( $\text{PPh}_3$ , >99%), sodium borohydride ( $\text{NaBH}_4$ , >98%), sodium hexafluoroantimonate ( $\text{NaSbF}_6$ , >99%), tetrabutylammonium perchlorate (TBAP, >99%), dichloromethane (DCM, HPLC grade,  $\geq 99.9\%$ ), n-hexane (Hex, HPLC grade,  $\geq 99.9\%$ ), methanol (MeOH, HPLC grade,  $\geq 99.9\%$ ), ethyl acetate (EA, HPLC grade,  $\geq 99.9\%$ ) and chloroform-d ( $\text{CDCl}_3$ , HPLC grade,  $\geq 99.9\%$ ). All glassware was cleaned with aqua regia ( $\text{HCl}:\text{HNO}_3=3:1$  V:V), and washed with copious nanopure water, then dried in an oven prior to use.

#### Synthesis

**Preparation of  $\text{Au}_3\text{Ag}_{48}$  alloy nanoclusters.** The overall synthesis process of  $\text{Au}_3\text{Ag}_{48}$  nanoclusters is directly reduce the metal complex in a mixed solvent of MeOH and EA. In a typical synthesis, 30 mg  $\text{AgNO}_3$  was dissolved in 5 mL MeOH with 20 mL EA added. Then an aqueous solution of  $\text{HAuCl}_4 \cdot 3\text{H}_2\text{O}$  (40  $\mu\text{L}$ , 0.2 mM) was added under stirring. The solution changed from white to yellow. After 5 min, HS-Adm (100 mg) and  $\text{PPh}_3$  (100 mg) were added under vigorous stirring. The yellow turbid solution turned white after 20 minutes. 20 mg  $\text{NaBH}_4$  dissolved in 1 mL nanopure water was quickly added into the solution. The reaction was allowed to overnight. To collect the crude product, the solution was centrifuged at 6000 rpm for 5 min, and the solid product was collected. The obtained material was washed with MeOH for three times.  $\text{NaSbF}_6$  dissolved in MeOH was mixed with the DCM solution of product to substitute the counter ions. A mixed solvent of DCM and Hex was used for crystal growth. The synthetic yield of  $\text{Au}_3\text{Ag}_{48}$  is 15.8% on Ag mole basis. Thin layer chromatography was employed to extract the products. Pink products were collected and DCM was added to extract the  $\text{Au}_3\text{Ag}_{48}$ .

**Preparation of  $\text{Pt}_2\text{Ag}_{51}$  alloy nanoclusters.** The synthesis process of  $\text{Pt}_2\text{Ag}_{51}$  nanoclusters is same as that of  $\text{Au}_3\text{Ag}_{48}$  excepting for the foreign metal salt. Specially, 40  $\mu\text{L}$  aqueous solution of  $\text{HAuCl}_4 \cdot 3\text{H}_2\text{O}$  was substituted with 50  $\mu\text{L}$  aqueous solution (0.2 mM) of  $\text{H}_2\text{PtCl}_6 \cdot 6\text{H}_2\text{O}$ . The synthetic yield of  $\text{Pt}_2\text{Ag}_{51}$  is 10.3% on Ag mole basis. Thin layer chromatography was employed to extract the products. Green products were collected and DCM was added to extract the  $\text{Pt}_2\text{Ag}_{51}$ .

#### Instrumentations

**Electrospray ionization mass spectrometry.** The crystal of  $\text{Au}_3\text{Ag}_{48}$  and  $\text{Pt}_2\text{Ag}_{51}$  are dissolved in a mixed solvent of DCM and MeOH to make a dilute solution, respectively. Then centrifuged for 5 minutes (9000 rpm) to get rid of any insoluble material. The centrifuged solution was then injected into a Bruker Q-TOF mass spectrometer at a flow rate 500  $\mu\text{L}/\text{min}$ . The gas temperature was kept at 80  $^\circ\text{C}$ . The results are analyzed in positive ionization modes of the ESI-MS.

**X-ray photoelectron spectroscopy.** X-ray photoelectron spectroscopy (XPS) measurements were

performed on a Thermo ESCALAB 250, configured with a monochromated Al Ka (1486.8 eV) 150 W X-ray source, 0.5 mm circular spot size, a flood gun to counter charging effects, and an analysis chamber base pressure lower than  $1 \times 10^{-9}$  mbar; and data were collected at FAT = 20 eV.

**<sup>31</sup>P NMR.** <sup>31</sup>P NMR data was collected on a Bruker Avance II spectrometer (400MHz). The samples was dissolved in CDCl<sub>3</sub>.

**Thermogravimetric analysis.** Thermogravimetric analysis (TGA) was carried out on a thermogravimetric analyzer (TGA Q5000 V3.17 Build 265) with ~6 mg of Au<sub>3</sub>Ag<sub>48</sub> and Pt<sub>2</sub>Ag<sub>51</sub> in an Alumina (Al<sub>2</sub>O<sub>3</sub>) pan at a heating rate of 10 °C/min from room temperature to 800 °C, respectively.

**UV-visible absorption spectroscopy.** The UV-Vis absorption spectrum of Au<sub>3</sub>Ag<sub>48</sub> and Pt<sub>2</sub>Ag<sub>51</sub> dissolved in DCM were recorded using Agilent 8453 diode array spectrometer. The background correction was made using a DCM blank. Solid samples were dissolved in DCM to make a dilute solution, with a subsequent transformation to a 1 cm path length quartz cuvette, followed by spectral measurements.

**Electrochemical measurements.** The electrochemical experiments were performed on CHI 660e. A Pt disk (d=0.5 mm) was used as working electrode. A Pt foil and a Ag/AgCl wire were used as counter and reference electrodes, respectively. All data were collected at room temperature. The concentration of samples was ~15 mM with 0.1 M TBAP, and the solution was purging with argon for 10 min before experiments.

**Photoluminescence spectroscopy.** Photoluminescence spectra were measured on a FL-4500 spectro-fluormeter with the same optical density (OD) ~0.05. The samples were dissolved in DCM for experiment.

**Single-crystal X-ray diffraction analyses.** The data collection for single crystal X-ray diffraction was carried out on a Bruker D8 venture diffractometer at 296.15 K, using a Mo-K<sub>α</sub> radiation ( $\lambda = 0.71073$  Å) for Au<sub>3</sub>Ag<sub>48</sub> and Pt<sub>2</sub>Ag<sub>51</sub>. Data reduction and absorption corrections were performed using the SAINT and SADABS programs,<sup>[1]</sup> respectively. The structure was solved by direct methods (SHELXS) and refined with full-matrix least squares on F<sup>2</sup> using the OLEX, and the solvent was squeezed by platon, due to large solvent voids.<sup>[2,3]</sup> All the refinement parameters are summarized in Table S3 and S4.

## References

- [1] APEX II software suite, Bruker-AXS, 2006.
- [2] SHELXTL, Sheldrick, G. M. *Acta Crystallogr. C* **71**, 3-8 (2015).
- [3] Dolomanov, O.V., Bourhis, L.J., Gildea, R.J, Howard, J.A.K. & Puschmann, H., *J. Appl. Cryst.* **42**, 339-341 (2009).

## Section 2. Supplementary Figures

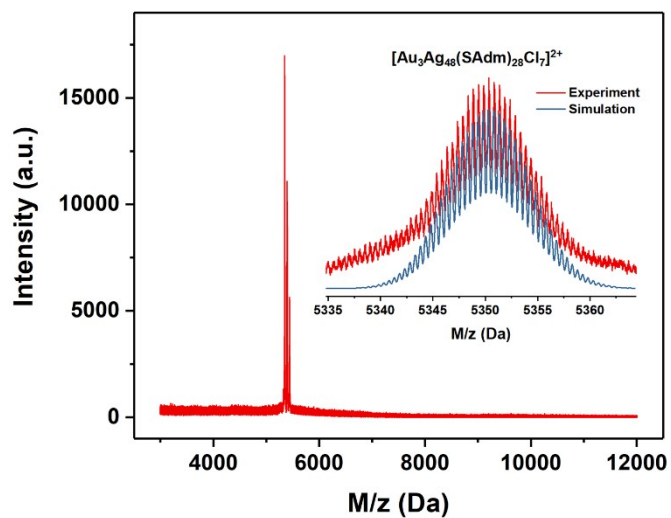

Figure S1. ESI of  $\text{Au}_3\text{Ag}_{48}$  nanoclusters. The main peak of 5350.3550 Da is assigned to the composition of  $[\text{Au}_3\text{Ag}_{48}(\text{SAdm})_{28}\text{Cl}_7]^{2+}$ , which matches the simulation result.

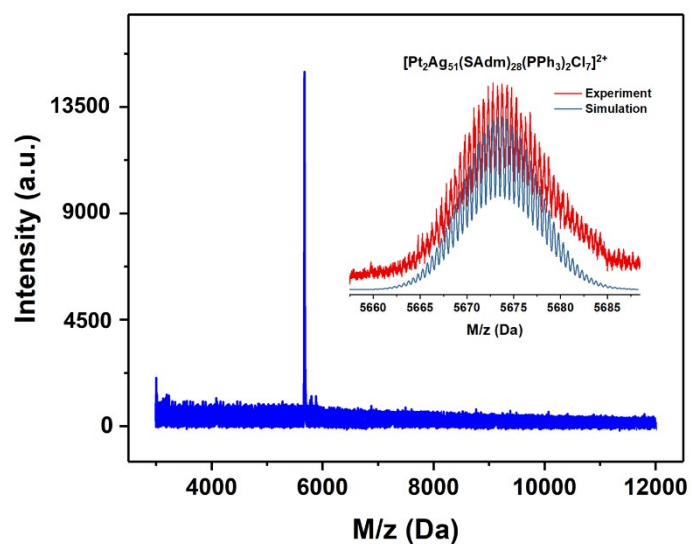

Figure S2. ESI of  $\text{Pt}_2\text{Ag}_{51}$  nanoclusters. The peak of 5673.7373 Da matches the composition of  $[\text{Pt}_2\text{Ag}_{51}(\text{SAdm})_{28}(\text{PPh}_3)_2\text{Cl}_7]^{2+}$ .

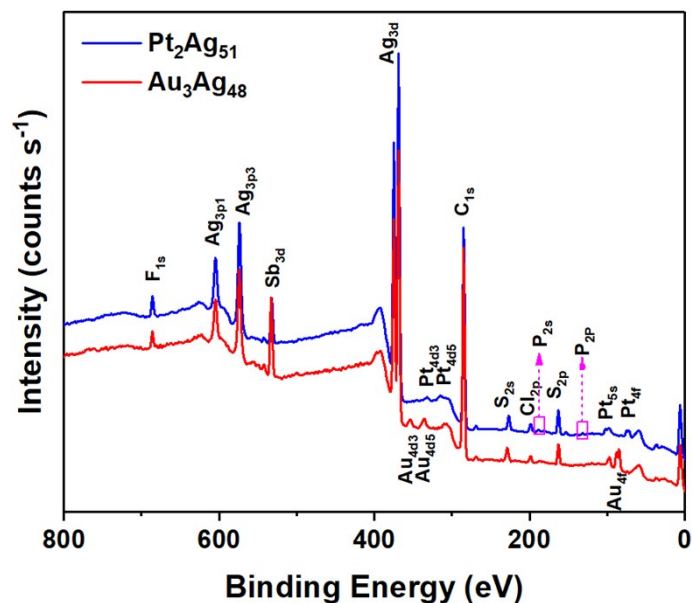

Figure S3. XPS of  $\text{Au}_3\text{Ag}_{48}$  and  $\text{Pt}_2\text{Ag}_{51}$ .  $\text{P}_{2s}$  and  $\text{P}_{2p}$  signals were merely observed in  $\text{Pt}_2\text{Ag}_{51}$ , which suggest the composition difference of  $\text{Au}_3\text{Ag}_{48}$  and  $\text{Pt}_2\text{Ag}_{51}$ .

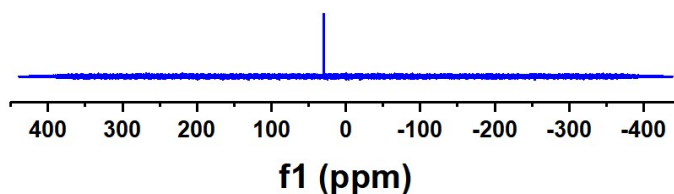

Figure S4.  $^{31}\text{P}$  NMR spectrum of  $\text{Pt}_2\text{Ag}_{51}$ . The chemical shift of 29.8127 ppm was detected in  $\text{Pt}_2\text{Ag}_{51}$ . The only one signal indicates the same chemical environment of these two  $\text{PPh}_3$  ligand in  $\text{Pt}_2\text{Ag}_{51}$ .

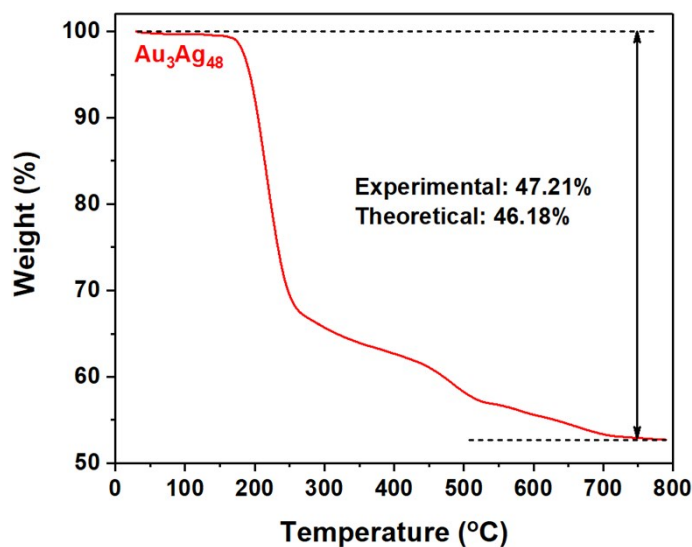

Figure S5. TGA of  $\text{Au}_3\text{Ag}_{48}$ . The experimental and theoretical weight loss of  $\text{Au}_3\text{Ag}_{48}$  are 47.21% and 46.18%.

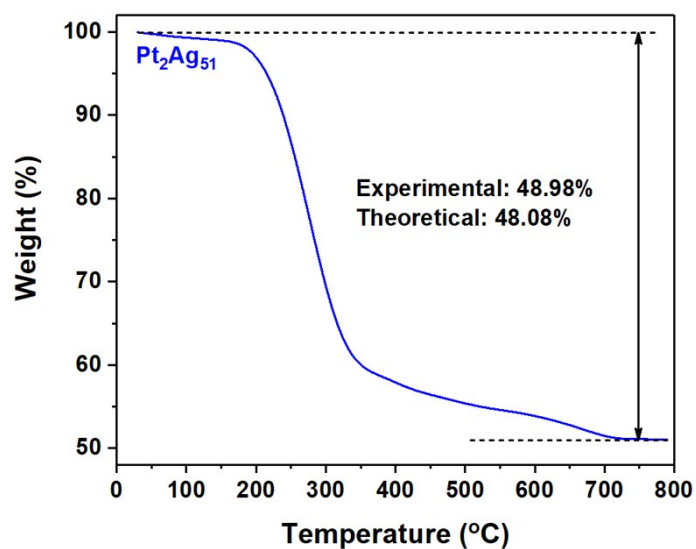

Figure S6. TGA of Pt<sub>2</sub>Ag<sub>51</sub>. The experimental and theoretical weight loss of Pt<sub>2</sub>Ag<sub>51</sub> are 48.98% and 48.08%.

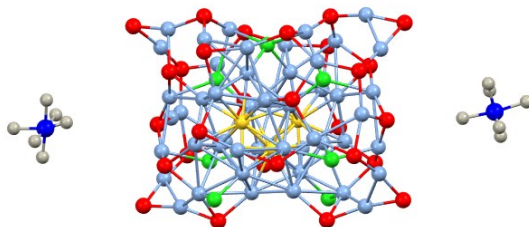

Figure S7. Total structure of [Au<sub>3</sub>Ag<sub>48</sub>(S-Adm)<sub>28</sub>Cl<sub>7</sub>](SbF<sub>6</sub>)<sub>2</sub>. All C and H atoms are omitted for clarity. Color label: pale blue = Ag; yellow = Au; red = S; green = Cl; dark blue = Sb; grey = F.

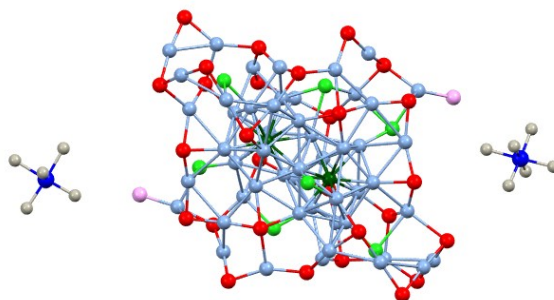

Figure S8. Total structure of [Pt<sub>2</sub>Ag<sub>51</sub>(S-Adm)<sub>28</sub>(PPh<sub>3</sub>)<sub>2</sub>Cl<sub>7</sub>](SbF<sub>6</sub>)<sub>2</sub>. All C and H atoms are omitted for clarity. Color label: pale blue = Ag; dark green = Pt; red = S; green = Cl; pink = P; dark blue = Sb; grey = F.

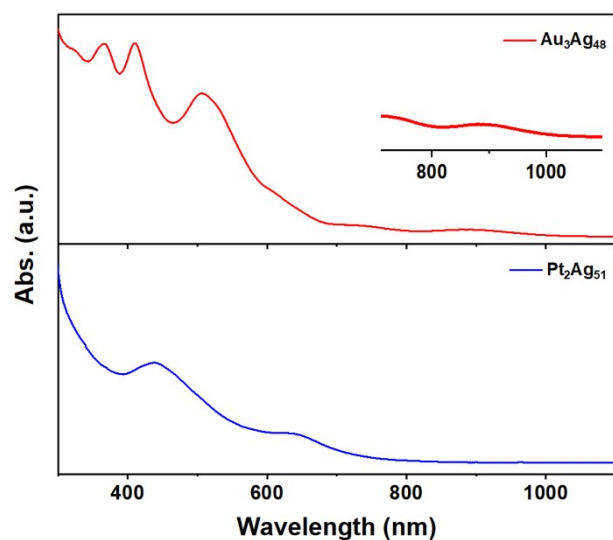

Figure S9. UV-Vis spectra of  $\text{Au}_3\text{Ag}_{48}$  and  $\text{Pt}_2\text{Ag}_{51}$ . The  $\text{Au}_3\text{Ag}_{48}$  shows multiple absorptions and  $\text{Pt}_2\text{Ag}_{51}$  shows two peaks in the UV-vis spectra.

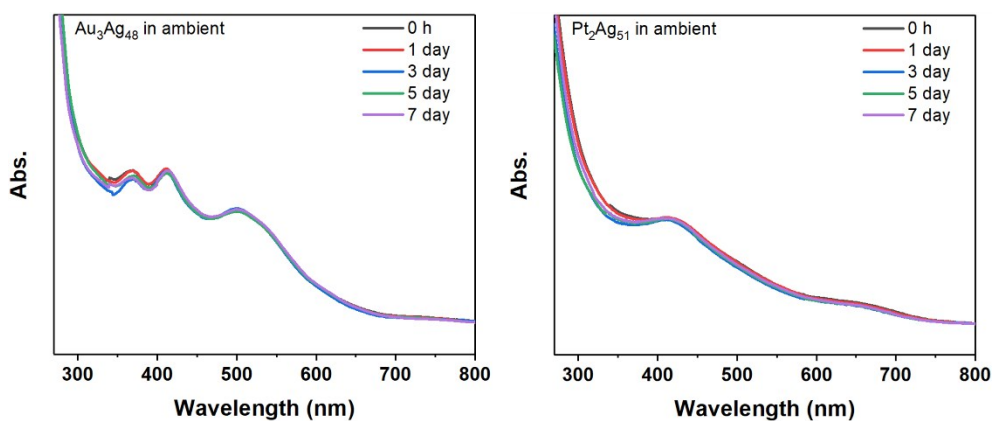

Figure S10. The UV-vis absorption spectra variation of  $\text{Au}_3\text{Ag}_{48}$  and  $\text{Pt}_2\text{Ag}_{51}$  in ambient. These two nanoclusters show good stability in ambient.

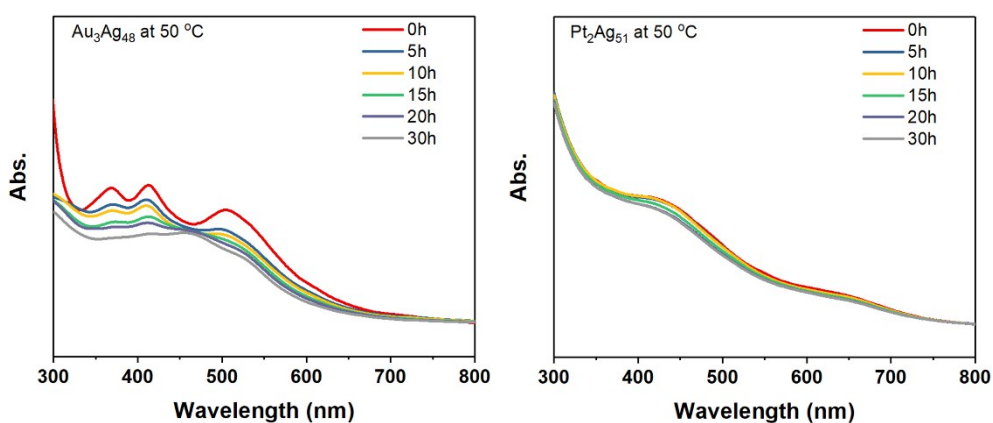

Figure S11. The UV-vis absorption spectra variation of  $\text{Au}_3\text{Ag}_{48}$  and  $\text{Pt}_2\text{Ag}_{51}$  at  $50\text{ }^\circ\text{C}$ . The results indicate that  $\text{Pt}_2\text{Ag}_{51}$  is more stable than  $\text{Au}_3\text{Ag}_{48}$  at high temperature.



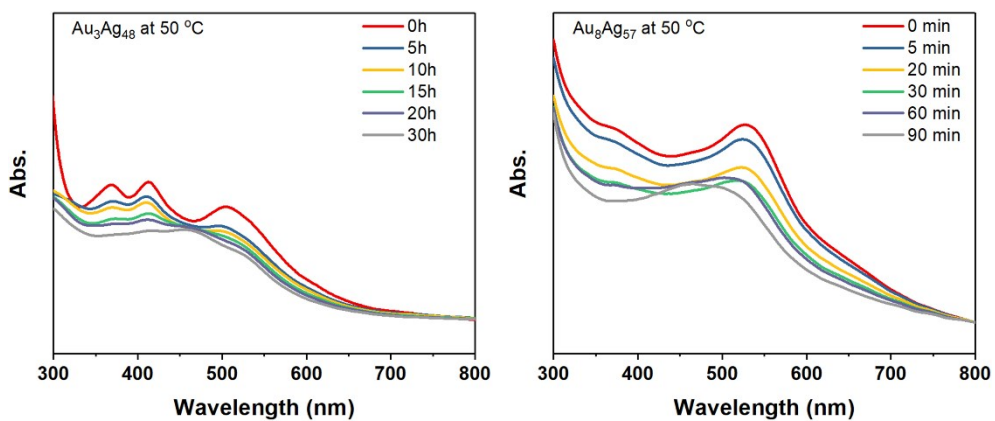

Figure S12. The UV-vis absorption spectra variation of  $\text{Au}_3\text{Ag}_{48}$  and  $\text{Au}_8\text{Ag}_{57}$  at 50 °C. The results indicate that  $\text{Au}_3\text{Ag}_{48}$  is more stable than  $\text{Au}_8\text{Ag}_{57}$  at high temperature.

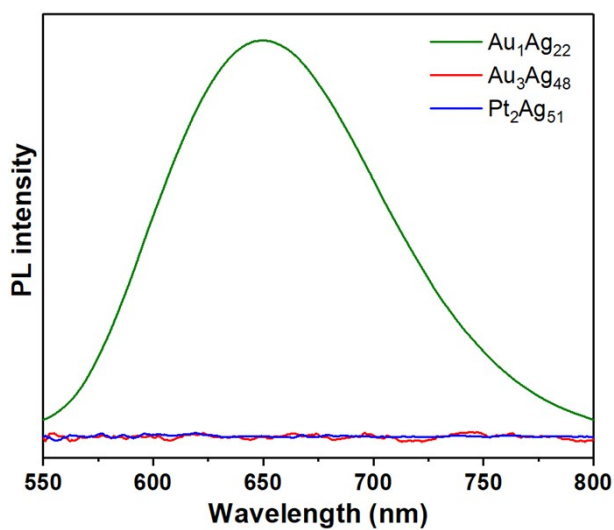

Figure S13. Photoluminescence of  $\text{Au}_3\text{Ag}_{48}$  and  $\text{Pt}_2\text{Ag}_{51}$ . The  $\text{Au}_1\text{Ag}_{22}$  with a red emission is employed as a comparison.  $\text{Au}_3\text{Ag}_{48}$  and  $\text{Pt}_2\text{Ag}_{51}$  display extremely weak and negligible emission.

### Section 3. Supplementary Tables

Table S1. Atom ratio of Au and Ag in Au<sub>3</sub>Ag<sub>48</sub>.

| <b>[Au<sub>3</sub>Ag<sub>48</sub>(S-Adm)<sub>28</sub>Cl<sub>7</sub>](SbF<sub>6</sub>)<sub>2</sub></b> | <b>Au atom</b> | <b>Ag atom</b> |
|-------------------------------------------------------------------------------------------------------|----------------|----------------|
| XPS Experiment Ratio                                                                                  | 6.12%          | 93.88%         |
| Theoretical Ratio                                                                                     | 5.88%          | 94.12%         |

Table S2. Atom ratio of Pt and Ag in Pt<sub>2</sub>Ag<sub>51</sub>.

| <b>[Pt<sub>2</sub>Ag<sub>51</sub>(S-Adm)<sub>28</sub>(PPh<sub>3</sub>)<sub>2</sub>Cl<sub>7</sub>](SbF<sub>6</sub>)<sub>2</sub></b> | <b>Pt atom</b> | <b>Ag atom</b> |
|------------------------------------------------------------------------------------------------------------------------------------|----------------|----------------|
| XPS Experiment Ratio                                                                                                               | 3.62%          | 96.38%         |
| Theoretical Ratio                                                                                                                  | 3.77%          | 96.23%         |

Table S3. Crystal data and structure refinement for Au<sub>3</sub>Ag<sub>48</sub>.

|                                             |                                                                                                                                    |
|---------------------------------------------|------------------------------------------------------------------------------------------------------------------------------------|
| Identification code                         | Au <sub>3</sub> Ag <sub>48</sub>                                                                                                   |
| Empirical formula                           | C <sub>280</sub> H <sub>406</sub> Ag <sub>48</sub> Au <sub>3</sub> Cl <sub>7</sub> F <sub>12</sub> S <sub>28</sub> Sb <sub>2</sub> |
| Formula weight                              | 11158.01                                                                                                                           |
| Temperature/K                               | 296.15                                                                                                                             |
| Crystal system                              | monoclinic                                                                                                                         |
| Space group                                 | C2/c                                                                                                                               |
| a/Å                                         | 41.6940(5)                                                                                                                         |
| b/Å                                         | 29.9362(4)                                                                                                                         |
| c/Å                                         | 62.1774(9)                                                                                                                         |
| $\alpha$ /°                                 | 90                                                                                                                                 |
| $\beta$ /°                                  | 108.9609(6)                                                                                                                        |
| $\gamma$ /°                                 | 90                                                                                                                                 |
| Volume/Å <sup>3</sup>                       | 73396.4(17)                                                                                                                        |
| Z                                           | 8                                                                                                                                  |
| $\rho$ calcg/cm <sup>3</sup>                | 2.020                                                                                                                              |
| $\mu$ /mm <sup>1</sup>                      | 4.087                                                                                                                              |
| F(000)                                      | 42848.0                                                                                                                            |
| Radiation                                   | MoK $\alpha$ ( $\lambda$ = 0.71073)                                                                                                |
| 2 $\Theta$ range for data collection/°      | 2.938 to 53                                                                                                                        |
| Index ranges                                | -52 $\leq$ h $\leq$ 52, -37 $\leq$ k $\leq$ 37, -78 $\leq$ l $\leq$ 78                                                             |
| Reflections collected                       | 440232                                                                                                                             |
| Independent reflections                     | 76000 [Rint = 0.0981, Rsigma = 0.1114]                                                                                             |
| Data/restraints/parameters                  | 76000/223/3746                                                                                                                     |
| Goodness-of-fit on F <sup>2</sup>           | 1.222                                                                                                                              |
| Final R indexes [I $\geq$ 2 $\sigma$ (I)]   | R1 = 0.1218, wR2 = 0.3289                                                                                                          |
| Final R indexes [all data]                  | R1 = 0.1983, wR2 = 0.3725                                                                                                          |
| Largest diff. peak/hole / e Å <sup>-3</sup> | 11.82/-6.54                                                                                                                        |

Table S4. Crystal data and structure refinement for Pt<sub>2</sub>Ag<sub>51</sub>.

|                                             |                                                                                                                                                   |
|---------------------------------------------|---------------------------------------------------------------------------------------------------------------------------------------------------|
| Identification code                         | Pt <sub>2</sub> Ag <sub>51</sub>                                                                                                                  |
| Empirical formula                           | C <sub>316</sub> H <sub>437</sub> Ag <sub>51</sub> Cl <sub>7</sub> F <sub>12</sub> P <sub>2</sub> Pt <sub>2</sub> S <sub>28</sub> Sb <sub>2</sub> |
| Formula weight                              | 11806.45                                                                                                                                          |
| Temperature/K                               | 296.15                                                                                                                                            |
| Crystal system                              | triclinic                                                                                                                                         |
| Space group                                 | P-1                                                                                                                                               |
| a/Å                                         | 25.6867(13)                                                                                                                                       |
| b/Å                                         | 30.3229(16)                                                                                                                                       |
| c/Å                                         | 37.0200(18)                                                                                                                                       |
| α/°                                         | 107.289(3)                                                                                                                                        |
| β/°                                         | 99.777(3)                                                                                                                                         |
| γ/°                                         | 110.352(3)                                                                                                                                        |
| Volume/Å <sup>3</sup>                       | 24582(2)                                                                                                                                          |
| Z                                           | 2                                                                                                                                                 |
| ρ <sub>calc</sub> /g/cm <sup>3</sup>        | 1.595                                                                                                                                             |
| μ/mm <sup>-1</sup>                          | 2.852                                                                                                                                             |
| F(000)                                      | 11386.0                                                                                                                                           |
| Radiation                                   | MoKα (λ = 0.71073)                                                                                                                                |
| 2θ range for data collection/°              | 1.552 to 51                                                                                                                                       |
| Index ranges                                | -31 ≤ h ≤ 31, -36 ≤ k ≤ 36, -44 ≤ l ≤ 44                                                                                                          |
| Reflections collected                       | 333552                                                                                                                                            |
| Independent reflections                     | 91119 [R <sub>int</sub> = 0.1479, R <sub>sigma</sub> = 0.1691]                                                                                    |
| Data/restraints/parameters                  | 91119/393/3844                                                                                                                                    |
| Goodness-of-fit on F <sup>2</sup>           | 1.022                                                                                                                                             |
| Final R indexes [I ≥ 2σ (I)]                | R <sub>1</sub> = 0.1183, wR <sub>2</sub> = 0.2958                                                                                                 |
| Final R indexes [all data]                  | R <sub>1</sub> = 0.2222, wR <sub>2</sub> = 0.3502                                                                                                 |
| Largest diff. peak/hole / e Å <sup>-3</sup> | 5.82/-5.96                                                                                                                                        |
